# Supplementary material for: High resolution genomic analysis of sporadic breast cancer using array-based comparative genomic hybridization
Source: Springer Nature journal article supplement (doi:10.1186/bcr1356), 2005-11-24
Supplement: Additional file 2 [file bcr1356-s2.doc]

Supplementary Data Table 2 – **All regions of copy number gain present in 30% of primary breast tumors.**
